# Supplementary material for: Terrain changes from images acquired on opportunistic flights by SFM photogrammetry
Source: Copernicus journal article supplement (doi:10.5194/tc-2016-228), 2016-10-31
Supplement: Supplementary file [file tc-2016-228-RC1-supplement.pdf]

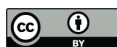

# Terrain changes from images acquired on opportunistic flights by SFM photogrammetry

Luc Girod<sup>1</sup>, Christopher Nuth<sup>1</sup>, Andreas Kääb<sup>1</sup>, Bernd Etzelmüller<sup>1</sup>, and Jack Kohler<sup>2</sup>

<sup>1</sup>Department of Geosciences, University of Oslo, Postboks 1047 Blindern, 0316 Oslo, Norway

<sup>2</sup>Norwegian Polar Institute, Framsenteret, Hjalmar Johansens gate 14, 9296 Tromsø

Correspondence to: luc.girod@geo.uio.no

**Abstract.** Structure from motion (SfM) photogrammetric techniques are emerging as powerful tools for surveying, at very high spatial and temporal resolution, geomorphological objects undergoing relatively rapid change, such as glaciers, moraines, or landslides. Modern software and computing power allows production of accurate data from low-cost surveys, compared to traditional photogrammetry conducted from dedicated fixed-wing aircraft missions. We present a method to take advantage of light-transport flights conducting other missions to opportunistically collect imagery for geomorphological analysis. We test and validate an approach in which we attach simple cameras and GNSS receivers to a helicopter to collect data when the flight path covers an area of interest. The novelty in our method is the ability to link GNSS data to images without a physical or electronic link. As a proof of concept, we conducted two test surveys in September 2014 and 2015 over the glacier-Midtre Lovénbreen and its forefield, in northwestern Svalbard. We were able to derive elevation change estimates complementing in-situ mass balance measurements using the glaciological method. Furthermore, we detect and analyze a number of processes in the proglacial area, including thermokarst and the evolution of water channels.

## 1 Introduction

The capability of structure from motion (SfM) photogrammetric techniques to survey geomorphological objects, such as glaciers, moraines or landslides, at very high spatial and temporal resolutions, is emerging as a powerful tool for better quantification and understanding the associated geomorphic processes. Modern software and computing power allow us to produce accurate data from relatively low-cost surveys. In this study, we present a method to take advantage of light-transport flights to collect imagery for precise DEM and orthoimage generation, to be used in geomorphological analysis.

The typical SfM pipeline (Figure 1) creates a georeferenced DEM and orthoimage from input imagery and geolocation data (Snavely et al., 2008; Niethammer et al., 2010; Westoby et al., 2012; Kääb et al., 2014; James and Robson, 2014; Ouédraogo et al., 2014; Tonkin et al., 2015; Nolan et al., 2015; Galland et al., 2016; Eltner et al., 2016). Normally, the camera's parameters (sensor and optics) are determined first, along with the relative picture locations and pointing angles from the photogrammetry itself. Then, by combining this information with embedded GNSS data and/or ground control points (GCPs), an accurate absolute reconstruction of the terrain is generated through dense multi-stereo matching.

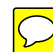

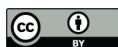

Our method exploits the malleability of SfM photogrammetry, compared to classical photogrammetry, **regarding flight path and aircraft stability**. In this study, we test and validate an approach to attach simple cameras and consumer-grade GNSS devices to an aircraft on other missions, with the aim of collecting data when the flight path is over an area of interest. The novelty in our method is the way in which we link the GNSS information to imagery, without the physical or electronic link typically found in high-precision purpose-built hardware. The ~~absence of associated costs~~ allows for failed trials and the collection of a surplus of images that could also be used for other projects ~~when~~ properly archived.

We first present ~~the generic~~ method, then our test area, ~~the specific survey~~ (data acquired, specific equipment used, data processing, and additional datasets for comparison), and ~~finish with~~ a brief ~~initial~~ geomorphological analysis and interpretation ~~conducted from our products~~.

Our ~~specific geomorphological research~~ goals are to detect and quantify surface changes of glacial and pro-glacial surfaces. ~~In particular, the measurement~~ of glacier geodetic balance from glacier elevation changes complements traditional in-situ measurements of mass balance (e.g. (Zemp et al., 2010; Andreassen et al., 2016)), for instance ~~in order to~~ detect bias in the in-situ estimates and ~~to provide~~ basis for ~~calibrating or~~ correcting for such biases (Zemp et al., 2013). ~~Associated with glacier wastage and climatic change~~, a number of other geomorphological processes occur in the pro-glacial environment, particularly associated with buried ice, frozen ground and hydrological processes. In this study, we derive methods for easily collecting digital elevation models over glaciers and the surrounding terrain, ~~for example, combined with annual mass balance surveys that often require helicopter or fixed wing transport~~.

## 2 Generic methodology

### 2.1 Acquisition hardware

The first ~~generic~~ step of our method is data acquisition, ~~following the general principle that it should~~ allow opportunistic data-gathering. ~~Therefore,~~ the associated hardware list presented below is not specific, ~~but~~ rather includes the key characteristics that ~~must~~ be satisfied. The actual ~~example~~ equipment used for our study is described in section 4.1.

**Cameras :** ~~Cameras for this method of surveying must have a few key characteristics. They should:~~ be easy to attach to any potential aircraft (or ~~have available attachment~~ kits); be weather-resistant; have ~~good~~ battery life; have ~~good image quality~~ (reasonably sharp, good dynamic range and low electronic noise); and **have an integrated time-lapse function**.

**GNSS :** A ~~simple~~ low-cost consumer-grade code-based GNSS ~~tracker~~ can be used for this method (e.g. a Garmin style hand-held GPS). It must be able to ~~record~~ positions ~~in a log~~ at a relatively high frequency (1 Hz is an acceptable value).

**Aircraft :** By ~~implication,~~ control over the type of aircraft is limited in our opportunistic method. The aircraft just needs to have space to securely attach the camera in an adequate position (i.e. the camera should look straight down, and have a free view to the survey object), and there should be a place for the GNSS tracker where signal reception is acceptable.

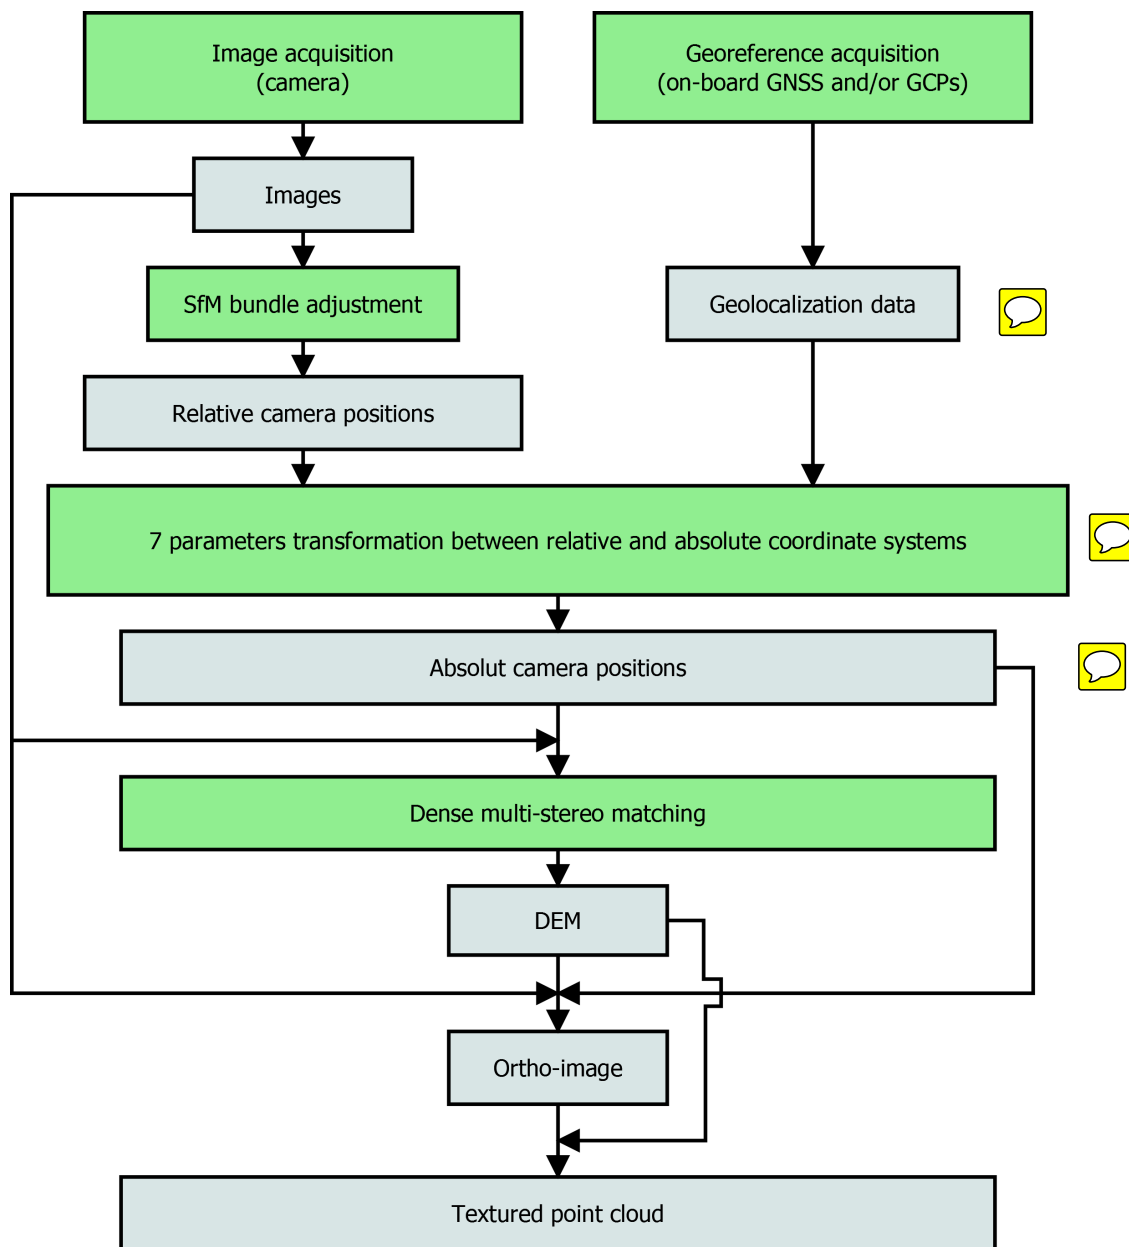

**Figure 1.** Standard SfM Photogrammetry processing workflow. Green boxes are processes and grey boxes are products.

## 2.2 Data processing workflow

Once data is acquired, it is processed through a typical SfM photogrammetric pipeline (see Figure 1). ~~For our processing,~~ we use the free and open-source integrated photogrammetric library MicMac, developed at the French National Institute

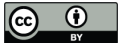

of Geographic and Forest Information (IGN) (Pierrot-Deseilligny and Clery, 2011; Pierrot-Deseilligny et al., 2016; Pierrot-Deseilligny, 2016)). MicMac is a highly versatile tool in which the user is in control of the processing parameters and can check intermediate results ~~underway~~, such as the calibration of the cameras, the relative positions, and the residuals of the absolute orientation transformation. Such capability is crucial for our method because the georeferencing information acquired  
5 by the ~~(not quite embedded)~~ GNSS system needs to be **linked to the images** through the non-trivial process discussed below.

### 2.3 Link between the cameras and the GNSS tracker

To estimate camera positions ~~in geographic coordinates~~, each picture must be linked to the GNSS track. **This should be possible to do by using the time tag in the images' metadata. However, camera clocks are neither precise nor accurate (Welty et al., 2013). Typically, time is only recorded with a 1-second precision.** In addition, even if we should expect a camera time-lapse mode to take pictures regularly, it is hardly the case. We performed in-lab measurements on a static GoPro H3+BE, using a sufficiently fast memory card to prevent the camera's buffer from filling, and **found a  $0.1 \pm 0.1s$  variation** in the actual lapse time ( $LT$ ) between two pictures, for the constant lapse time programmed in the camera. If the memory card is not fast enough to write a constant flow of images, the buffer of the camera often gets filled, yielding additional irregular delays on the time between images (up to one extra second in our case). Plotting ~~the  $TimeStamp_{expected}$  vs  $TimeStamp_{EXIF}$  space~~ shows  
15 jumps of one second every time the accumulated delay exceeds one second (figure 2).

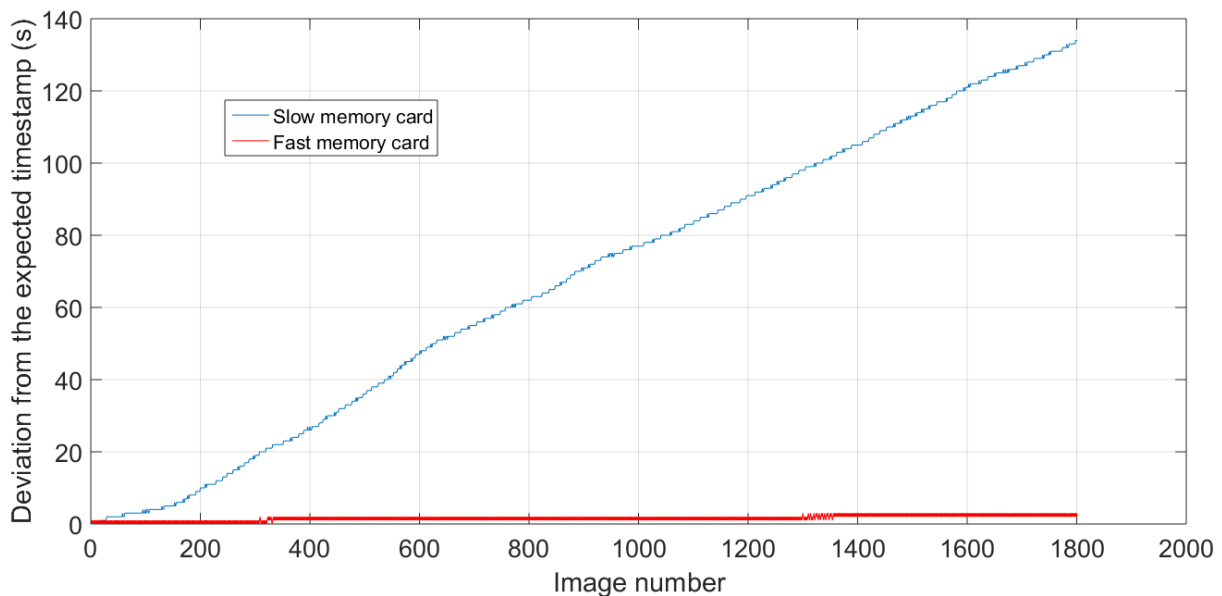

**Figure 2.** Differences between expected time stamps of pictures for a 30-minute period with a lapse time of one second and the EXIF time stamp recovered from the first 1800 images of a GoProH3+BE. Results are either for a relatively slow micro-SD card (64GB SanDisk Ultra microSDXC Class 10 UHS-I) or a fast card (32GB SanDisk Extrem Plus microSDHC UHS-I/U3). The fast card diverges by only 2s after 30 minutes, while the slow card diverges by 134s at a visibly irregular rate.

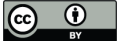

Given that the actual lapse times are different to those expected, we have to approximate the time-stamp  $Time_i$  for each picture by finding the parameters in

$$Time_i = Delay_{GPS-0} + TimeEXIF_0 + LT_{inter-image} \times i, \quad (1)$$

where  $Delay_{GPS-0}$  is the difference between the camera clock and the GPS clock for the first image,  $TimeEXIF_0$  the camera clock for the first image and  $LT_{inter-image}$  the lapse time between the acquisition of two pictures.  $LT_{inter-image}$  can be approximated by dividing the difference in camera-registered time between the first and last pictures by the total number of pictures, e.g.

$$\widehat{LT} = (TimeEXIF_n - TimeEXIF_0)/(n - 1). \quad (2)$$

It can also be estimated more robustly, especially in cases where  $LT_{inter-image}$  is inconsistent, by performing a piecewise linear regression in the  $ImageNumber$  vs.  $TimeStamp_{EXIF}$  space. In that case, each image is linked with an associated time  $T_{0-i}$  that separates its acquisition to the acquisition of the first image. We then use

$$Time_i = Delay_{GPS-0} + TimeEXIF_0 + T_{0-i} \quad (3)$$

to associate a time to each image.

The other parameter,  $Delay_{GPS-0}$ , can also be easily estimated by taking a picture of the screen of the GNSS receiver, comparing the time displayed on the GNSS receiver image to the time stamp in the image metadata, or by setting the camera time as accurately as possible shortly before the flight, such that  $Delay_{GPS-0} \approx 0$ . Of course, both methods only yield an approximate value, a value that is only as accurate and precise as the GPS receiver display, for instance. The actual value needs to be refined further.

This refinement is performed by minimizing the root-mean-square (RMS) difference between the fitting of the camera's relative positions, as solved from the SfM photogrammetry, to the simulated camera positions along the GPS track assuming different values of  $Delay_{GPS-0}$ . For each set of such simulated positions, a seven-parameter transformation is computed:

$${}^wL = \lambda \times {}^wR_{rs} \times ({}^{rs}L - {}^wC_{rs}), \quad (4)$$

where  ${}^wC_{rs}$ ,  ${}^wR_{rs}$  and  $\lambda$  are the translation vector, rotation matrix and scaling factor between the relative and absolute coordinate systems, and  ${}^{rs}L$  and  ${}^wL$  are the coordinates of a point in the two systems. The parameters computed through least-square adjustment provide the best fit between the two trajectories, and the distances between the simulated positions and the positions resulting from the adjusted transformation provide an estimate of the accuracy of the simulated positions. Figure 3 shows the mean residuals of such a fit as a function of different  $Delay_{GPS-0}$  values in our 2015 test survey (Section 4).

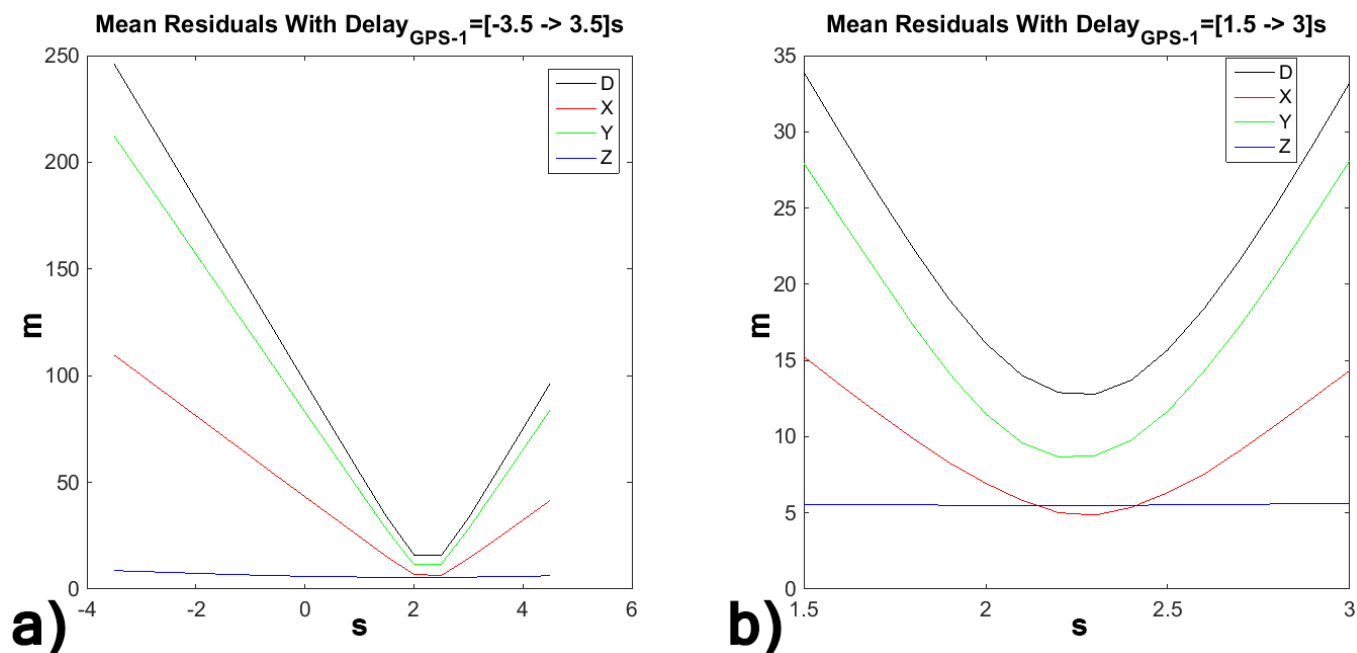

**Figure 3.** Mean residuals in x, y and z coordinates and in Cartesian distance D of differences between raw GPS positions and SfM-reconstructed relative positions, as a function of different start-time  $Delay_{GPS-1}$  offsets between GPS and camera. a) search area from -3.5 to +3.5 seconds, in 0.5-s increments; b) finer-scale area from 1.5 to 3.0 seconds in 0.1-s increments. The best value is found at  $\approx Delay_{GPS-1} = 2.3s$ . Note that the Z-coordinate is nearly independent of the  $Delay_{GPS-1}$ , because the flight used here was mostly at a constant altitude.

### 3 Study area

Our study area is in the vicinity of the Ny-Ålesund research base, in northwest Svalbard (78°53'N - 12°03'E, figure 4). Ny-Ålesund is characterized by a comparatively mild but nonetheless Arctic climate, whose mean annual temperatures is  $\approx -6^{\circ}C$  (Førland et al., 2012), and where there is continuous permafrost up to ca. 400 m thick (Liestøl, 1977; Humlum et al., 2003).

5  
 10  
 Glaciers cover ca. 60% of Svalbard's land area, and comprise a variety of ice caps, tidewater glaciers, valley glaciers, and cirque glaciers. Svalbard glaciers are typically polythermal (Björnsson et al., 1996), with a temperate accumulation area and cold marginal areas, where the ice is frozen to the bed. This thermal regime gives rise to glacier marginal land systems in which the glacier forefield is underlain by permafrost and remnants of glacier ice from previous glacier advances (e.g. (Etzelmüller and Hagen, 2005)). Ice-cored moraines are predominant, and are at present in different stages from stable to areas undergoing downwasting and thermokarst processes (e.g. (Etzelmüller, 2000)).

Our study site is Midtre Lovénbreen, a well-studied glacier with a wealth of background data. It is  $\approx 5km^2$ , and is situated in a north-facing catchment on the peninsula Brøggerhalvøya. Midtre Lovénbreen has one of the longest continuous mass-balance records in the High Arctic (Hagen and Liestøl, 1990; Kohler et al., 2007). As part of the long-term mass balance monitoring,



the glacier has a system of stakes frozen into the ice. Precise positions of these stakes have been measured using dual-phase GNSS equipment bi-annually since 1999. The glacier forefield of Midtre Lovénbreen comprises a large moraine system, with some parts potentially underlain by ice (Tonkin et al., 2015). The study area provides an ideal test site for our work since a helicopter is required to access other glaciers nearby, and is typically available in late summer and early autumn. Thus we are able to hitchhike on these flights with our simple camera setup, described in detail below.

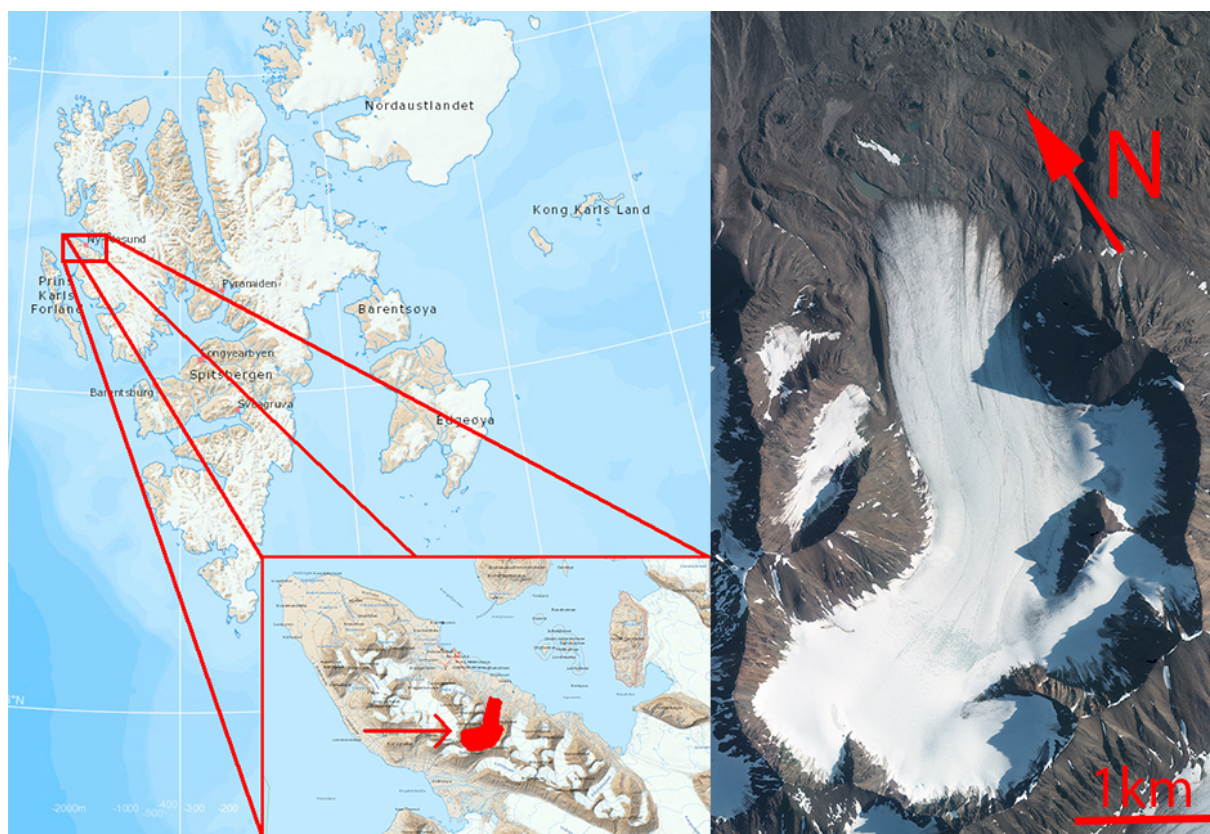

**Figure 4.** Location of Midtre Lovénbreen on Svalbard (map from <http://toposvalbard.npolar.no/>) and a 2010 ortho-image of the area.

## 4 Data and methods specific to the case study

### 4.1 Data Acquisition

Two test surveys (September 2014-09-15 and 2015-09-03) were conducted over the glacier and its forefield during routine helicopter flights to other nearby areas. Having surveys on two consecutive years allowed us to check the repeatability of the method as well as its ability to detect annual changes.



The two surveys were conducted under very different weather conditions, which led to distinctly different glacier surfaces (Figures 5 and 9):

- In 2014, there is a thin layer of fresh snow on the ice and ground. There are long, sharp shadows due to clear skies and the low sun-angle of late September at this high latitude.
- 5 – In 2015, there is no snow yet, so the images show bare ground and ice. There are no shadows due to overcast conditions on the day of the survey.

The different light conditions led to different camera parameters. The surface brightness during the 2014 flight made the camera choose an average exposure time of 1/1500 s, while the darker conditions in 2015 led to an average exposure time of 1/500 s. It is questionable whether this was sufficiently fast to avoid motion blur, thus the 2015 survey images may contain a slight rolling shutter distortion, that is, images are stretched in the y-axis, corresponding to the flight direction.

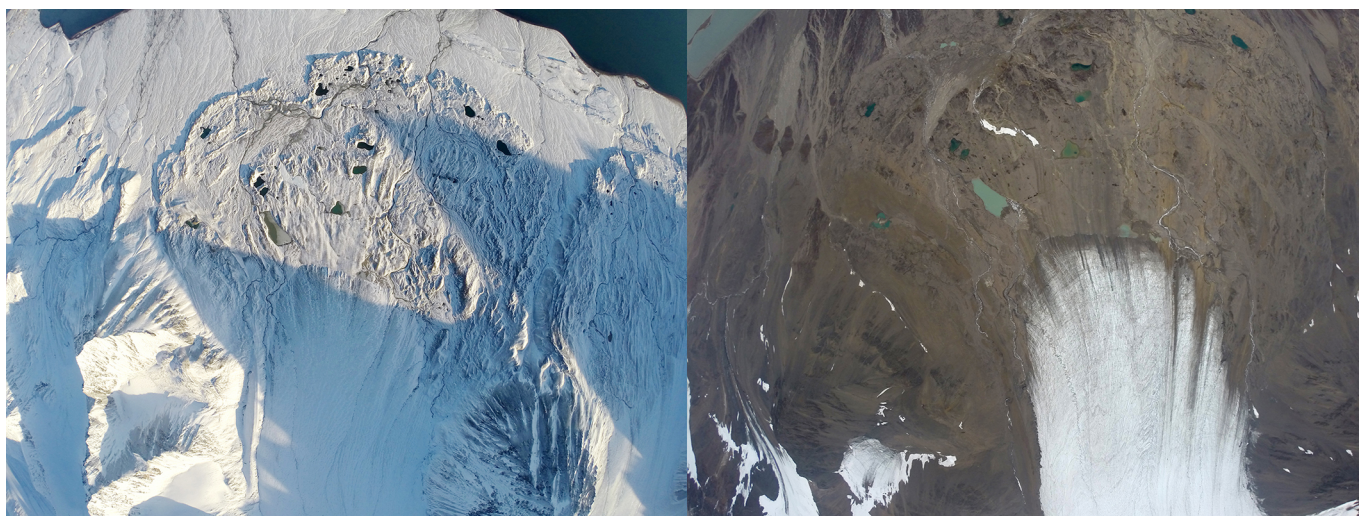

**Figure 5.** Sample images from our surveys (left : 2014 ; right : 2015)

The aircraft used was an Eurocopter AS350 helicopter. The camera is easily attached to the cargo swing from standard action-camera accessories (green marker in figure 6). We acquired data by making a detour on flights going to a neighboring glacier. The 2015 acquisition was performed in parallel with an IceCam survey (section 4.4.2). The surveys took about 10 minutes each, flying at average altitudes and speeds of 1500m and 35ms<sup>-1</sup> in 2014, and 1100m and 50ms<sup>-1</sup> in 2015.

- 15 For our camera, we used a GoPro Hero 3+ Black Edition. At a relatively low price, it offers durable construction, decent image quality and a variety of accessories for attaching to an aircraft's under-body, landing gear, carrying latch or other locations. In addition, it offers a wide field of view that, at the cost of fish-eye distortion, ensures good coverage of the whole area of interest. Fish-eye lenses are typically hard to calibrate simultaneously within the SfM process from in-flight nadir images; however, one can perform a calibration separately (e.g. in the lab, or under more suitable geometric ground conditions) and



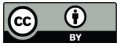

input it into the orientation step. In a case such as this study where the topography is very rugged and its variation is more than half of the flight height, simultaneous in-flight calibration (also called auto-calibration) is actually possible. Figure 5 shows sample images from the surveys. For both surveys, the camera was set to take a picture at 1 Hz.

The GNSS system was a hand-held consumer-grade hiking GPS device, the GARMIN GPSmap 60CSx. After installing the camera on the helicopter and initializing image acquisitions, we acquired pictures of the Garmin GPS display showing the time for about one minute. Then, prior to take-off, the GPS receiver was placed in the front of the nose of the helicopter, close to the lower front window (see red marker in figure 6). After the flight, we again acquired pictures of the GPS time display in order to calibrate the image acquisition times.

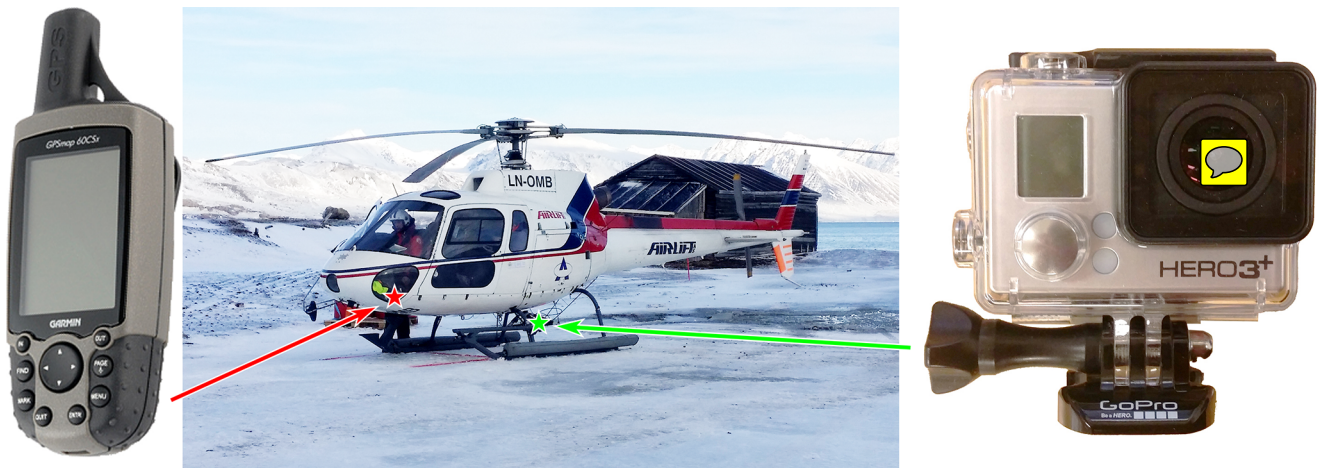

Figure 6. GARMIN GPSmap 60CSx – Eurocopter AS350 (picture taken in Ny Ålesund, right before take-off in Sept 2014) – GoPro H3+BE

## 4.2 Processing

Once the images and GPS track were obtained, a visual check confirmed that the data were good and ready for processing. Because the helicopter flew higher than expected on both surveys, we were able to crop the image to keep only the  $2500 \times 2500$  pixels around the center of the GoPro images, where image quality is best and distortion is minimized, while nonetheless maintaining sufficient overlap between images. The first part of the SfM photogrammetric process (automatic tie-point identification, followed by auto-calibration and computation of the cameras relative positions and orientations) was then performed.

Using the methods proposed in section 2.3, the segmented linear regression method estimated the  $T_{0-i}$  values measured and the seven-parameter transformation residual minimization method resulted in estimated values for  $Delay_{GPS-0}$  of 4.7s and 2.3s in 2014 and 2015, respectively.

Calibration errors are common when performing auto-calibration using nadir images and may lead to a high-order bias (or doming effect, e.g. (James and Robson, 2014)) affecting the precision of the DEM. Therefore, we refined the auto-calibration through GNSS-guided bundle adjustment using the camera coordinates computed from  $Delay_{GPS-0}$  and all the  $T_{0-i}$  to



constrain the x-, y-, and z-axes, with higher weights on the x-axis since it is the most sensitive to calibration errors. The z-coordinates also vary smoothly along the flight, and a strong temporal coherence in the GNSS data can therefore be expected for that component. The residuals for all images before and after that step are presented in Figure 7. From this final orientation and calibration, DEMs and orthoimages at 2-m ground sampling distance (GSD; 2014) and 1-m GSD (2015) were extracted using the MicMac software.

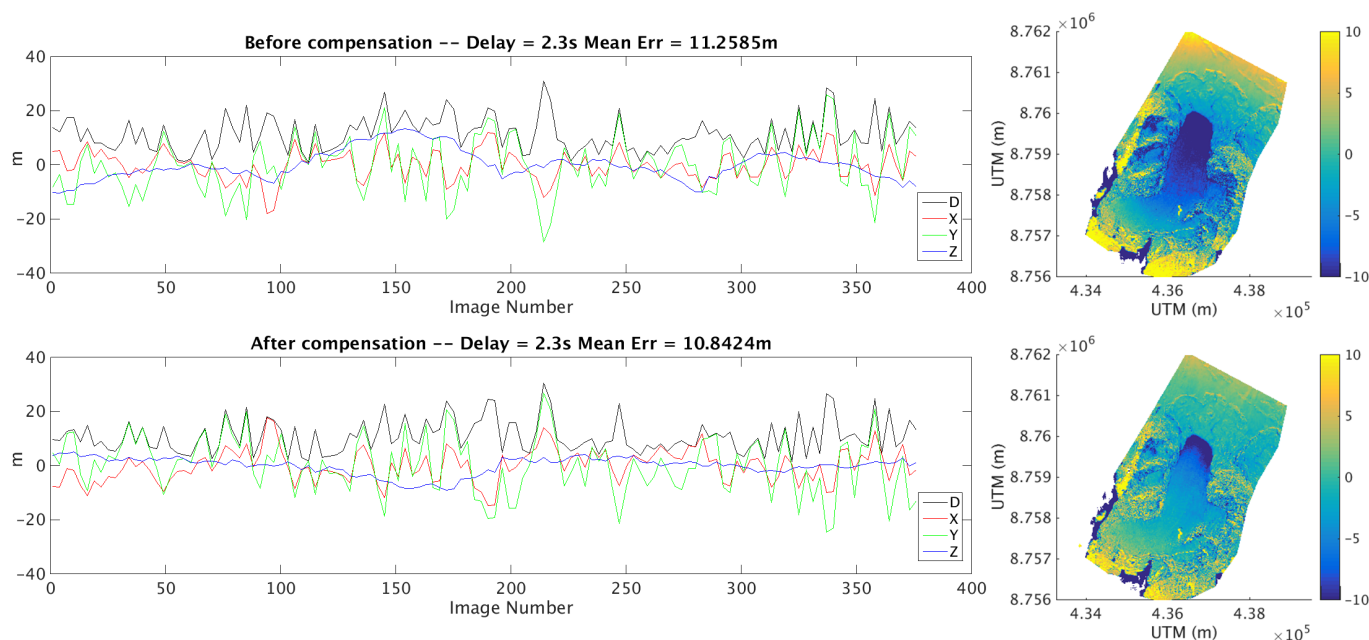

**Figure 7.** Residuals of the fit between the GNSS-extracted positions and the relative SfM-based orientation of the images, before and after the GNSS-guided bundle adjustment for the 2015 flight. There is a systematic error in the z-axis coming from a misestimated focal length (each of the 4 "bumps" in the upper panel corresponds to a line of flight (Figure 9)). Right-hand panels show the DEM differences to a reference DEM from 2010. The non-compensated DEM (upper-right panel) has a significantly stronger dome-shaped distortion pattern. After correction, the magnitude of the doming is less than the precision of the GPS.

### 4.3 DEMs and orthoimages

The above processing resulted in the creation of DEMs and orthoimages over the glacier and its moraine. However, during the 2014 flight, the light snow cover on the surface, especially in the upper glacier, combined with the bright sunshine and long shadows to create a high global radiometric dynamic; this led to a limited local dynamic range in the images captured by the camera. An absence of coherent features made the correlation phase fail in the upper half of the glacier (Figure 8) for the 2014 survey.

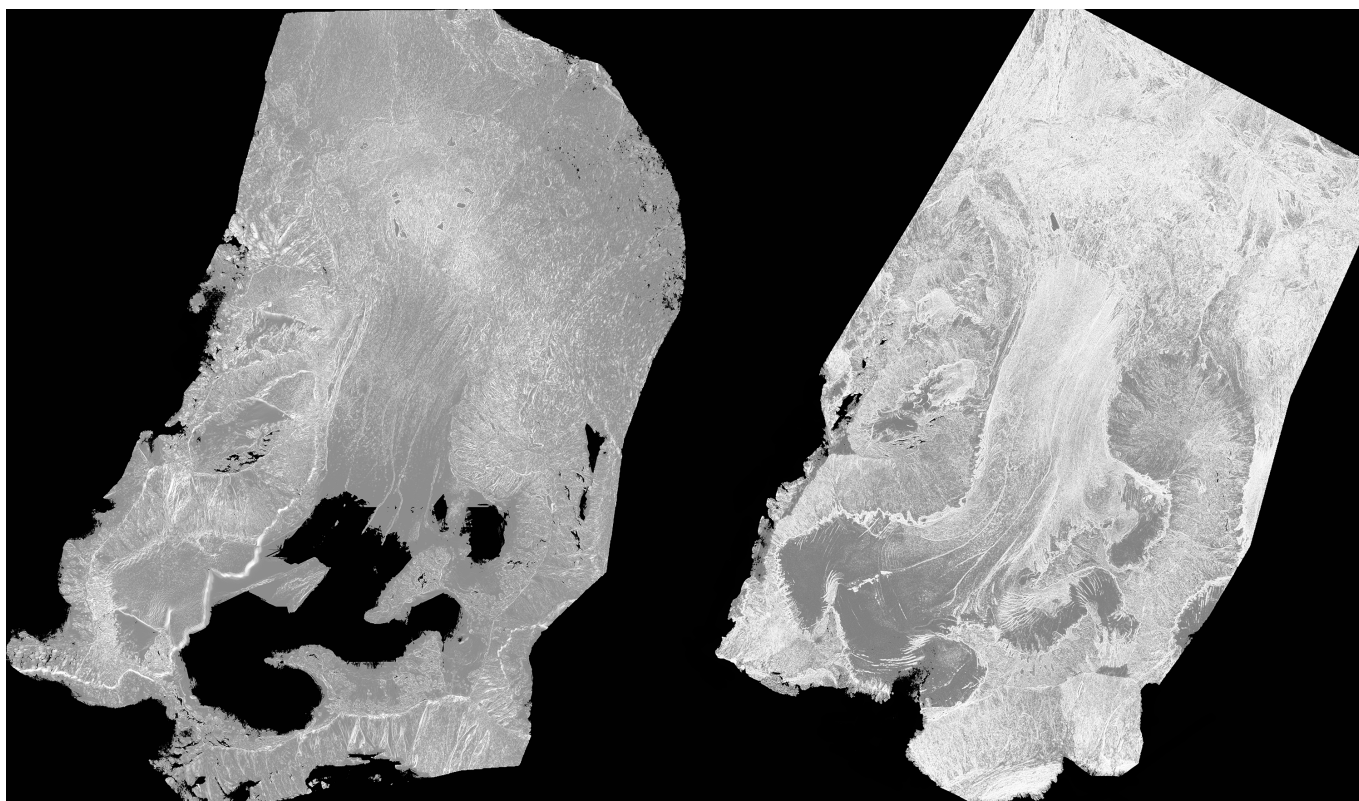

**Figure 8.** Correlation scores for 2014 (left) and 2015 (right) GoPro flights. White indicates perfect correlation, shades of gray imperfect correlation and black no correlation.

**Table 1.** Characteristic of the products

| Method  | Ultracam  | GoPro     | IceCam    |
|---------|-----------|-----------|-----------|
| Year    | 2010      | 2014/2015 | 2015      |
| GSD     | 0.25m     | 2m/1m     | 0.5m      |
| Product | DEM+Ortho | DEM+Ortho | DEM+Ortho |

#### 4.4 Additional datasets

To validate our data and perform surface elevation change analysis, we gathered two additional data sets from different sources. Table 1 compiles the key information and Figure 9 shows the orthoimages and flight paths of all data sets.



#### 4.4.1 UltracamXP 2010

In 2010, the Norwegian Polar Institute (NPI) commissioned photogrammetric flights over the study area, as part of a Svalbard-wide photogrammetry campaign. The camera system used was a Microsoft Vexcel UltracamXP digital aerial mapping system (Microsoft, 2016) with a 60/20 overlap. This professional photogrammetric system is fully integrated and outputs pan-sharpened images at 0.25 m GSD, with associated GPS/INS information. We processed the images with MicMac to create a DEM and an orthoimage, using the in-flight GPS information for georeferencing.

#### 4.4.2 IceCam 2015

The IceCam system (Divine et al., 2016) was designed to retrieve small-scale sea ice topography. It was flown in September 2015 to assess its use for larger-scale land surveys. The hardware component of the system comprises two Canon 5D Mark II cameras, a combined Novatel GPS/INS unit, and a laser altimeter mounted in a single enclosure outside the helicopter. The altimeter has a limited range and could not be used for this survey. The images were also processed with MicMac in a similar way as the UltracamXP 2010 dataset, creating a DEM and an orthoimage, using the in-flight GPS information for georeferencing.

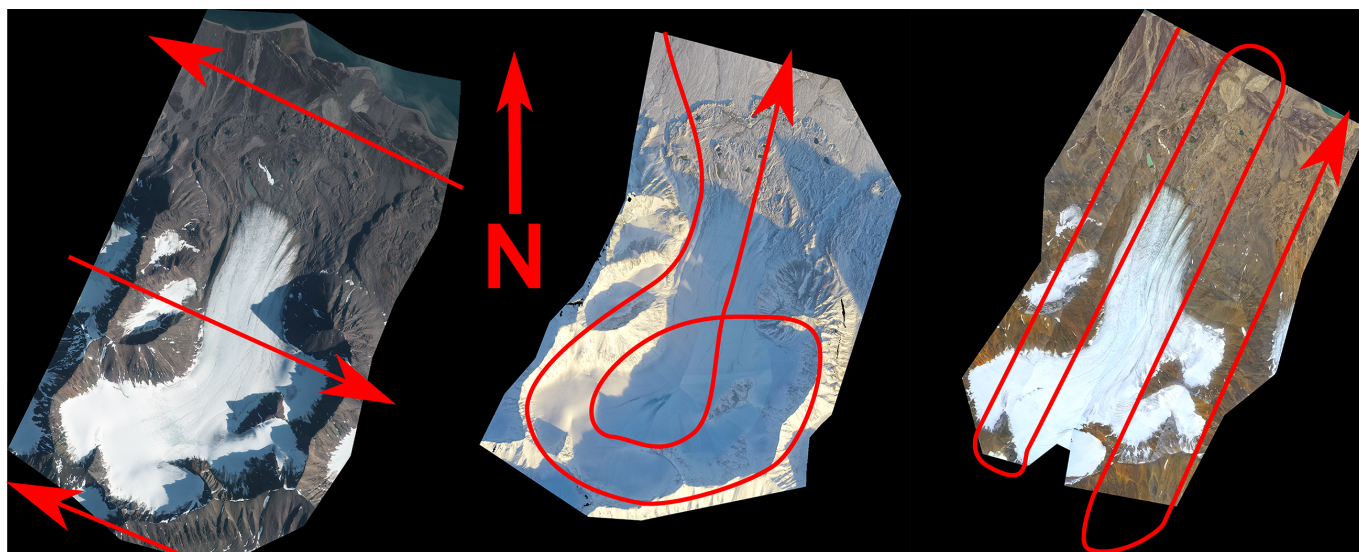

**Figure 9.** Orthoimages produced for the UltraCam data of 2010 (left), GoPro 2014 (middle) and GoPro 2015 (right). Flight lines are indicated in red.



## 5 Results and interpretations

### 5.1 DEM comparisons

First, all DEMs were compared to each other, focusing on areas with assumed stable terrain (i.e. off-glacier). Because of the low absolute accuracy of the low-cost code-based GPS tracker, DEM differencing reveals patterns related to translations and rotations between the DEMs. We co-registered the DEMs using a modified version of the algorithm of (Nuth and Kääb, 2011), which incorporates rotations about the x- and y-axes, in addition to the 3-D translation:

$$dh = a \times \cos(b \text{ aspect}) \times \tan(\text{slope}) + c + d \times x + e \times y, \quad (5)$$

where  $dh$  is elevation difference,  $a$  and  $b$  describe the translation vector amplitude and direction respectively,  $c$  is the mean vertical difference, and  $d$  and  $e$  are the rotation parameters describing a linear plane rotated about the x- and y-axes. Translations were typically on the order of a few meters.

To assess the quality of our products, we compared the 2015 GoPro product with the 2015 IceCam DEM, which is made from images acquired on the same flight. These differences reveal a standard deviation after co-registration of 1.92m for the whole scene, after removal of obvious outliers (Figure 10). This value is however still affected by the remaining doming effect mostly seen at the edges of the survey area (Figure 7, lower right panel; Figure 10, left panel). In the lower glacier area, where correlation is good in both data sets and where the doming effect only minimally affects the data, the standard deviation is 0.46m.

We then co-register and difference the 2014 and 2015 DEMs with each other and with the 2010 DEM. A number of features are visible in our difference maps but the two main geomorphological phenomena that are visible in the data are the thickness change of the glacier and thermokarst processes at the western lateral glacier moraine. Figure 12 shows profiles of the DEMs and DEM difference maps over both phenomena (see positions of the profiles on Figure 11).

### 5.2 Glacier elevation changes

As part of the Midtre Lovénbreen mass balance program conducted by the Norwegian Polar Institute, in-situ glacier stakes are surveyed and measured bi-annually. Differential dual-phase GNSS is used to measure elevations of the tops of stakes, which are frozen into the ice surface. Distances to the local ice surface are measured using a tape from the stake top to a pole lying on the uneven ice surface, oriented in two positions, to yield an average elevation of the ice surface in the immediate vicinity of the stake. The difference between two such measurements made in autumn represents the change in the ice elevation over a year, as well as an additional component due to the movement of the stake downslope. We estimate and remove the latter by using the horizontal annual velocity multiplied by the tangent of the slope at the stake, as determined from the 2010 DEM.

Typically, during glacier retreat, greatest ice loss is at the glacier tongue, and decreases upglacier. From 2010 to 2015, the tongue of Midtre Lovenbreen has lost up to 14 m of ice. Our 2014 to 2015 differences show a significant annual change of up to -3 m. The comparison of the DEM differences at the position of the stakes with the stake measurement provides a

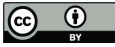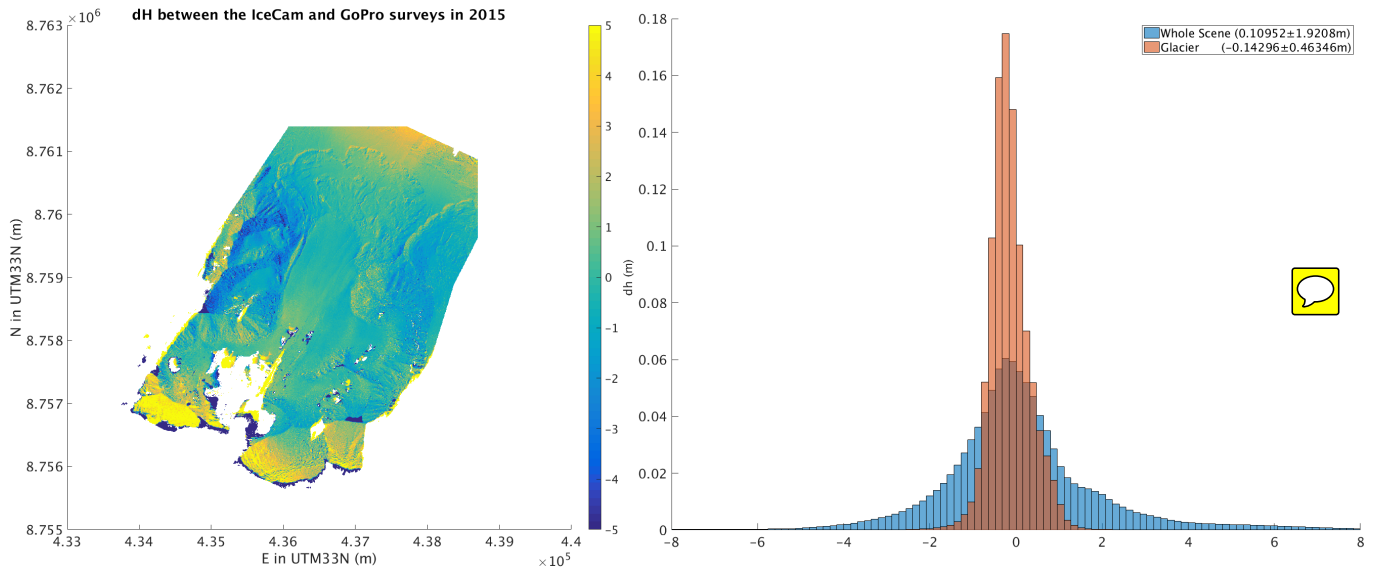

**Figure 10.** DEM differences between simultaneous IceCam and GoPro surveys of 2015. Residual doming is evident in the GoPro survey, as well as areas where either the IceCam or the GoPro surveys failed to produce useful data because of a lack of texture in the images (fresh snow, for instance). A histogram of the differences, after removal of outliers ( $dH > 10m$ ), is shown to the right for the whole scene and for the glacier only.

completely independent evaluation of the quality and reliability of our method. Figure 13 shows the position of the stakes and the observed bias in height difference. The bias between the 2010 reference data and the 2015 data that we produced (computed for stakes 1 to 11) is  $0.08 \pm 0.19\text{my}^{-1}$  while the bias between the 2014 and 2015 flight (computed for stakes 1 to 4 only) is  $-0.61 \pm 0.46\text{my}^{-1}$ . The residual bias is a combination of the remaining doming of the DEMs from the imperfect camera calibration ( $\pm 0.46\text{m}$ ) as well as the **bias** from the glaciological stake measurements, estimated to be  $0.28\text{my}^{-1}$ . The observed trend in bias with elevation in the 2010-2015 difference (Figure 13) is coherent with the submergence/emergence of ice with about  $20\text{my}^{-1}$  on the tongue,  ~~$0\text{my}^{-1}$  at the dynamic ELA~~ and  $-20\text{my}^{-1}$  in the accumulation area.

Since the whole glacier is covered by our 2015 survey, we can estimate an average elevation change ~~for the whole area covered by it~~ between 2010 and 2015 ~~as well~~. The mean elevation change at the stake positions is  $-3.06 \pm 0.46\text{ m}$  ~~over 5 years~~ with our method, and  $-3.51 \pm 1.42\text{ m}$  from the stake measurements. The mean elevation change ~~integrated~~ over the entire surface covered by the two DEMs is  $-2.85 \pm 0.46\text{ m}$ . The similarity in point-based and area-based mean elevation change indicates that the glacier stake measurements ~~represent well~~ changes occurring over the glaciers ~~as a whole~~.

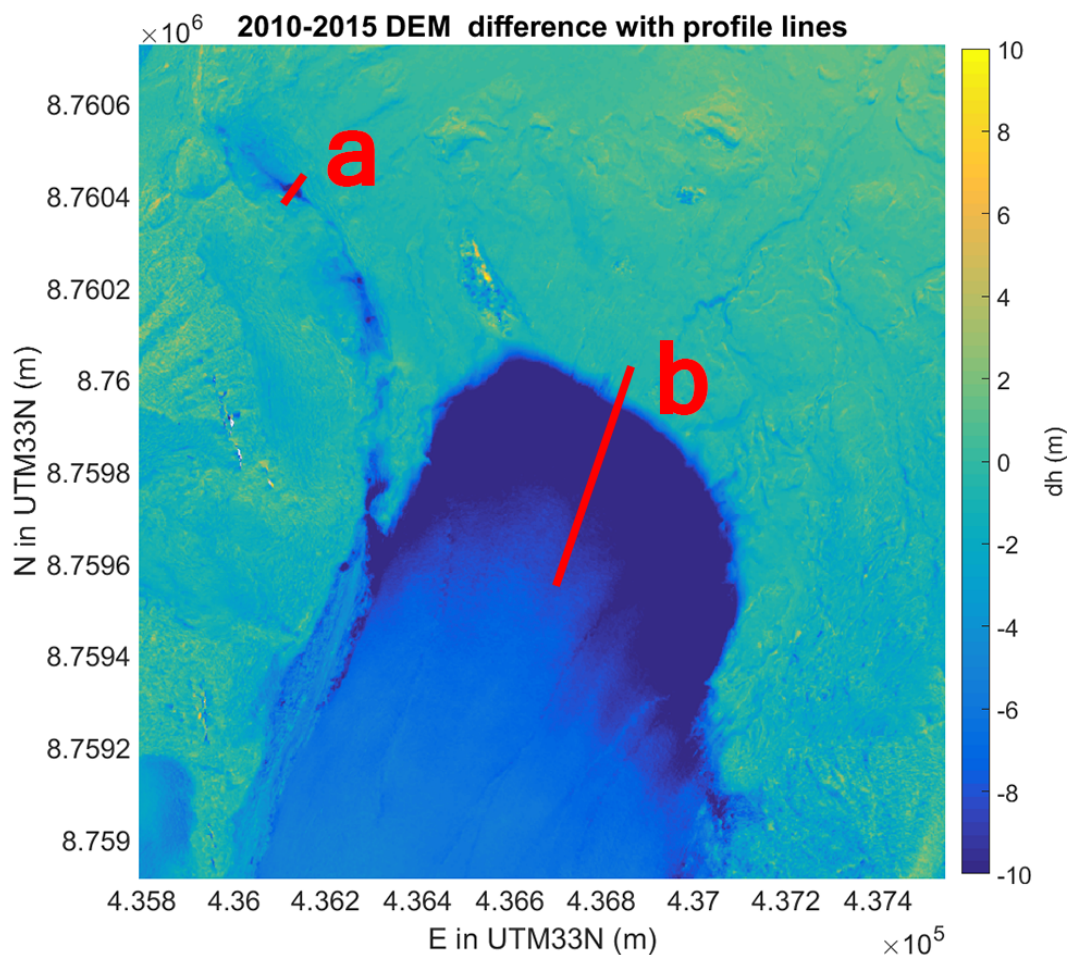

**Figure 11.** DEM difference map of the tongue of the glacier between 2010 and 2015. In red are the two lines from which profiles were extracted, ‘a’ for the ice-cored moraine and ‘b’ for the glacier terminus.

### 5.3 Pro-glacial area

To evaluate the performance of the DEMs produced and make geomorphological interpretations for the pro-glacial area of Midtre Lovénbreen, we focus on the following zones: the left (western) lateral ice-cored moraine; the proglacial dead ice area; and the main glacier runoff channel (Figure 14).

- The most prominent elevation differences between the 2010 and 2015 DEMs in the proglacial area can be found along the left lateral moraine (Figure 14b). This moraine is, like many similar ones on Svalbard, ice-cored (Etzelmüller, 2000) and thus potentially subject to thermokarst processes (Kääb and Haeberli, 2001). In fact, strongest elevation losses of up to 2 m/yr happen at thermokarst lakes and ice fronts where substantial ice loss occurred over the 5 year period is observed. Even between

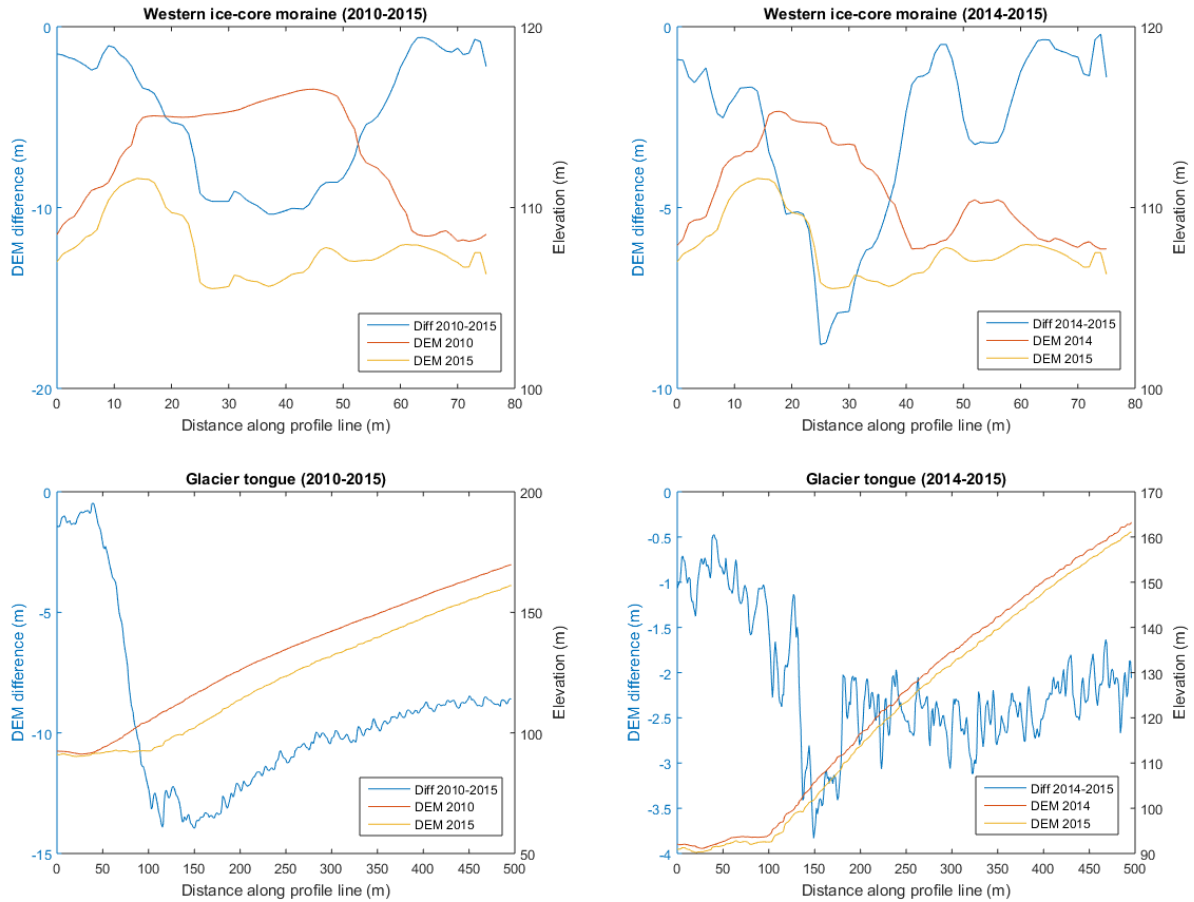

**Figure 12.** Profiles extracted from the 2010, 2014 and 2015 DEMs, and DEM differences associated with them. Top is profile ‘a’ from Figure 11 and bottom is profile ‘b’. Blue lines are DEM differences (scale on the left axis) while red and orange are the DEM values (scale on the right axis, red is the older of the two DEMs).

the 2014 and the 2015 DEMs ice melt at the margin of thermokarst lakes and retreat of ice fronts can be detected, both on the left lateral ice-cored moraine and at other thermokarst lakes on the proglacial dead-ice area.

Also, other sections of the ice-cored moraine without clearly visible thermokarst depressions show surface lowering of up to 1 m/yr and more. This points to the fact that the debris cover over the ice deposits is thinner than the local permafrost active layer so that the annual zero-degree isotherm reaches the ice and is able to melt substantial amounts of it (Etzelmüller, 2000; Tonkin et al., 2015). The enhanced lowering rates 2010-2015 on the ice-cored moraine area give a clear spatial pattern, suggesting that ground-ice contents or debris-cover characteristics could well be mapped and investigated from elevation changes such as derived in this study (cf. (Tonkin et al., 2015)). For this purpose we also see no difference, regardless of whether the 2015 GoPro or the 2015 IceCam DEMs are used. Both reveal similar results because the actual elevation changes clearly exceed the combined uncertainty of the respective DEM differences to the 2010 UltraCam DEM.



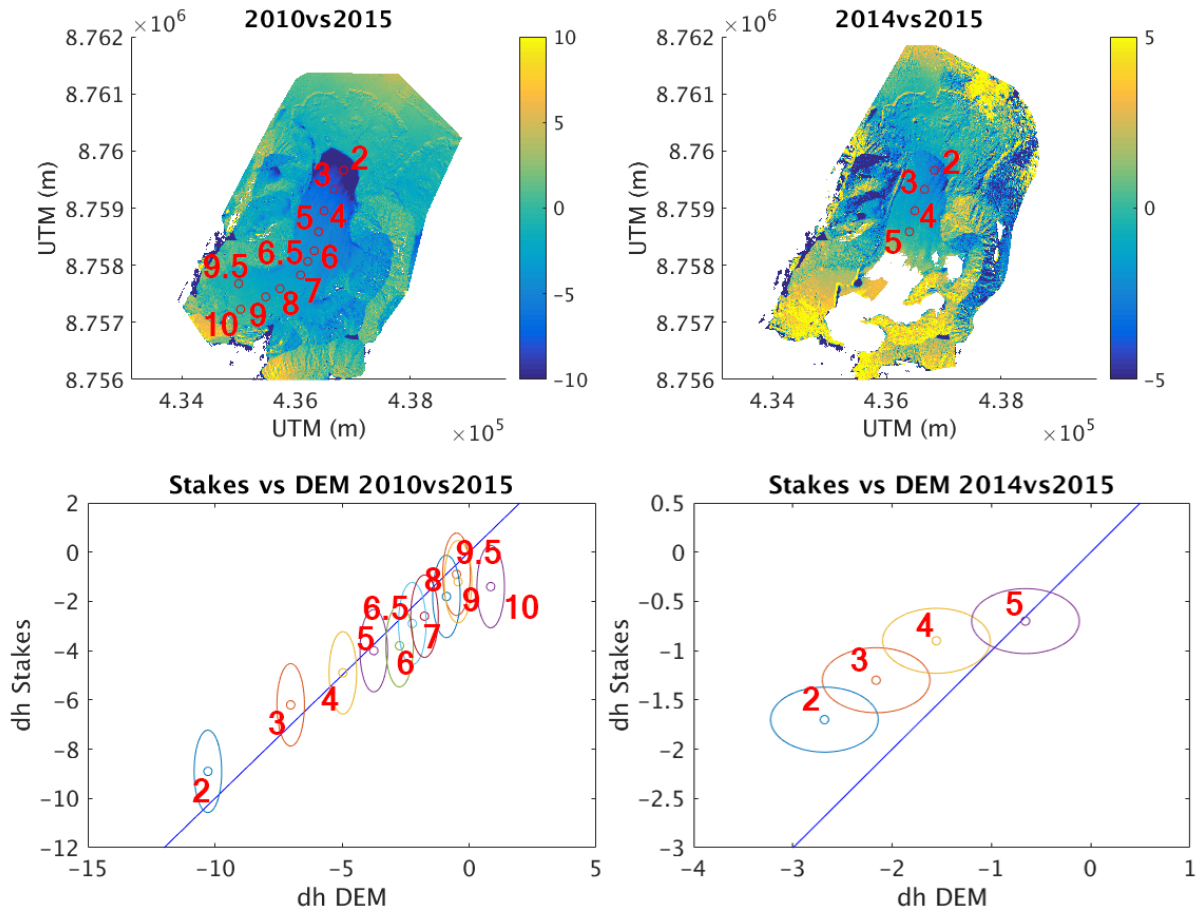

**Figure 13.** Top : position of mass balance stakes overlaid on the DEM difference for 2010-2015 (left) and 2014-2015 (right). Bottom : Height variation at the stake positions according to the DEMs (x-axis) versus ~~according to~~ the stake measurements (y-axis).

The maximum lowering rates seen over intact debris-cover on the ice-cored moraine exceed values found by (Tonkin et al., 2015) for 2003-2014 on the lateral moraine/dead-ice area at neighboring Austre Lovénbreen, hinting to higher ice content or thinner debris cover for the western lateral moraine of Midtre Lovénbreen. Our DEM ~~area~~ also covers the dead-ice/ice-cored moraine area investigated by (Tonkin et al., 2015) for 2003-2014, and we find a similar pattern and similar lowering rates as found by these authors.

We also assess changes over the (potential) dead-ice areas in front of Midtre Lovénbreen. Besides some thermokarst lakes growing in the glacier forefield, in which local lowering rates are up to 1 m/yr due to expanding lake shores, surface lowering rates elsewhere ~~seem to be~~ close to or within the uncertainty of the DEM differences, and can be seen as residual zonal DEM shifts, long-wavelength vertical distortions, or image stripe patterns. We thus choose to only interpret local variations in elevation changes that should not be affected by the above errors ~~with longer wavelengths~~.

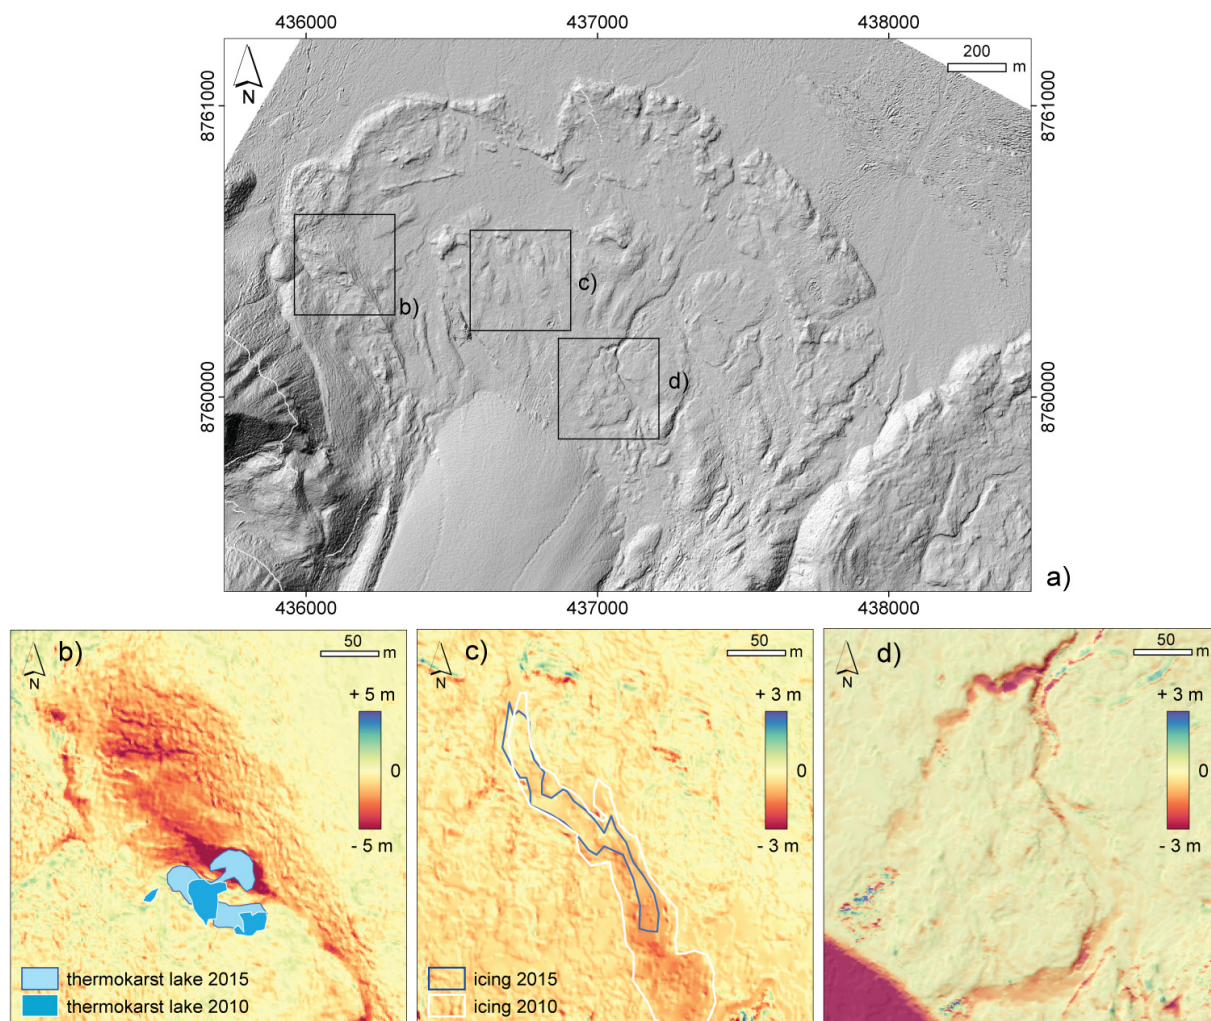

**Figure 14.** a) Hillshade of the glacier forefield from the 2015 GoPro-derived DEM. Rectangles b) - d) indicate the location of respective panels of the lower row of the figure. b) Elevation changes 2010-2015 over a section of the lateral ice-cored moraine with the position of thermokarst lakes indicated. c) Elevation changes 2010-2015 over a section of the central forefield with icing. d) Elevation changes 2010-2015 over proglacial channels; glacier terminus to the lower left; elevation changes underlain by the hillshade to better indicate channel positions.

There seem to be sections with lowering rates of up to around 0.1 m/yr over 2010-2015, but also areas that seem to change little. Most of the local patterns of elevation changes coincide with spatial variations in landforms. For instance, the borders of some (thermokarst?) depressions seem to erode and thus produce elevation loss. Also, where the glacier forefield has a rough topography with depressions and small hills typical for thermokarst areas, a spatially variable pattern of elevation changes is visible. In contrast, where the glacier forefield topography is ~~more smooth~~, the elevation changes also display less spatial

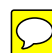



variations. In one area of the forefield there was surface icing present in both 2010 and 2015; DEM differencing showed that the ice accumulation is 1.5 – 2 m lower in 2015 compared to 2010 (Figure 14c). In sum, there is a contrasting pattern of mostly stable or lowering surface elevations of up to about -0.1 m/yr over the proglacial area that seems to reflect patterns in ground ice loss and erosive processes. A detailed quantitative analysis with the DEMs produced and over the time period investigated, however, is difficult as a pattern of higher-order DEM biases of the same order of magnitude overlays the geomorphological signals related to most of the dead-ice processes present in the glacier forefield investigated. Etzelmüller (2000) also investigated elevation changes on ice-cored moraines and dead-ice areas, but not on Midtre Lovénbreen. His elevation change rates found over 1970-1990, though, are fully in line with our above findings.

As a third landform example we describe elevation changes 2010-2015 over the main glacier stream (Figure 14d). Over its entire reach in the forefield there are elevation losses exceeding those on the surrounding areas, of up to 6 m over the 5-year period, at places where the stream cut a new path through the moraine material. Lateral channel erosion of up to 5 m over the 5-year period can be seen at the margins of steep stream flanks. Also, where the stream area gets wider and more braided in the forefield we find elevation loss of about 0.5 m over the 5-year period, more than on the surrounding, roughly stable terrain, and a loss that is probably due to stream bed erosion during periods of high discharge. Outside of the glacier forefield, imagery shows some sediment fan accumulating with new deposits. Elevation gains at these locations are some 10s of cm, with a spatially consistent pattern, although the change is not statistically significant with respect to the combined accuracy of our DEM differences.

#### 5.4 Conclusions

We present a methodology of deriving high-resolution DEMs and orthoimages using simple, inexpensive off-the-shelf cameras and code-based hand-held GNSS receivers, mounted on airborne platforms. The core of the methodology is to synchronize the inaccurate photograph times with the GNSS receiver timer during the SfM processing. We illustrate our methodology over an Arctic glacier, Midtre Lovénbreen on Svalbard, using opportunistic helicopter flights performed for other purposes. In our case study, we are easily able to detect glacier thickness changes over a 5-year period, but also over one year, although the latter results are more sensitive to the small biases resulting from the imperfection of the camera orientation and calibration. In comparison to the stake-derived in-situ elevation differences, the higher-order DEM biases are relatively most significant over one year but are reduced dramatically when differencing over many years.

Our results show the potential to derive accurate DEMs of a glacier from opportunistic flights, for example, as combined with in-situ mass-balance surveys of the glacier in our study site. In this manner, the acquisition of DEMs and subsequent DEM differences for deriving the geodetic balance over mass-balance glaciers is simpler and more easily acquired for those monitoring these glaciers. Our methods can help further the application of photogrammetry to non-experts needing high-quality terrain products. As one application scenario, photogrammetric DEMs could be easily acquired as a by-product whenever helicopter flights are needed to reach a study glacier, or to reach other field sites in general.

The strongest limitation to detecting subtle elevation changes over our 5-year observational period are higher-order vertical and horizontal biases in the DEMs produced and thus in the DEM differences derived. These biases restrict the statistical



significance ~~level~~ of the elevation differences to a range of 0.5 – 1.0 m, although local patterns of elevation differences seem significant to ~~smaller values~~, ~~as little~~ as 0.1 m.

Thermokarst processes and general ice loss on the lateral ice-cored moraine ~~investigated~~ are evident in our results and can be valuable to map potential and degrading ground-ice content, or potential thicknesses of its debris cover (Tonkin et al., 2015).  
5 Also ~~other~~ processes, such as icing or erosion in and at the margins of stream channels, can be quantified. Small elevation changes in other parts of the forefield show reasonable spatial patterns and change rates, but quantification of these changes is complicated by the ~~above~~ higher-order DEM biases.

Most of the high-order biases visible ~~such as the doming effect discussed by (James and Robson, 2014)~~ can be blamed on the GoPro fish-eye lens: its calibration is challenging and the low-quality GNSS data was not sufficient to completely remove  
10 the observed biases. However, the GPS data still helped significantly (Figure 7). It must also be noted that even if the lens's field-of-view results in a very wide swath, it is impossible to use the whole image. This is because the viewing angle to an object on the side of an image is so different to that in the middle of an image; it is not recognizable in the matching algorithm, which leads to the absence of tie point detection and failure in the correlation step. We therefore recommend using a camera with less ~~lens distortion and a more stable calibration~~ (i.e. a non fish-eye lens). Cameras from the Olympus Tough series,  
15 Panasonic FT series or Nikon AW series are good examples of field-worthy cameras that can produce better images (for our purpose) than a GoPro.

Finally, even with an optically satisfactory camera, there is still the inherent problem of correlating images ~~on~~ the white, contrast-free surface, of a landscape covered in fresh snow, as seen in our test survey in the upper glacier sections. This will to some extent always be a problem when using optical imagery, although solutions are being developed, e.g. increased color  
20 depth or cameras ~~with sensor~~ without infra-red filters (Nolan et al., 2015).

*Author contributions.* L. Girod designed the study, developed the method and processing, and wrote the paper. C. Nuth set up the field work, provided data and discussion, and analyzed data. A. Käab and B. Etzelmüller analyzed data, and J. Kohler provided glacier mass balance data. All co-authors contributed to writing the paper.

*Acknowledgements.* The study was funded by the European Research Council under the European Union's Seventh Framework Program  
25 (FP/2007-2013)/ERC grant agreement no.320816 and the ESA projects Glaciers\_cci (4000109873/14/I-NB) and GlobPermafrost (4000116196/15/IN-B). Helicopter flights were operated and funded by the Norwegian Polar Institute mass balance program, with additional funding from the Research Council of Norway RASTAR project (No 208013/F50). We are grateful to Tor Ivan Karlsen and Dimity Divine for assistance in the acquisition of the IceCam data.



## References

- Andreassen, L. M., Elvehøy, H., Kjøllmoen, B., and Engeset, R. V.: Reanalysis of long-term series of glaciological and geodetic mass balance for 10 Norwegian glaciers, *The Cryosphere*, 10, 535–552, doi:10.5194/tc-10-535-2016, <http://www.the-cryosphere.net/10/535/2016/>, 2016.
- 5 Björnsson, H., Gjessing, Y., Hamran, S.-E., Hagen, J. O., Liestøl, O., Pálsson, F., and Erlingsson, B.: The thermal regime of sub-polar glaciers mapped by multi-frequency radio-echo sounding, *Journal of Glaciology*, 42, 23–32, 1996.
- Divine, D. V., Pedersen, C., Karlsen, T. I., Aas, H. F., Granskog, M., Hudson, S., and Gerland, S.: Photogrammetric retrieval and analysis of small scale sea ice topography during summer melt, *Cold Regions Science and Technology*, pp. –, doi:<http://dx.doi.org/10.1016/j.coldregions.2016.06.006>, <http://www.sciencedirect.com/science/article/pii/S0165232X16301148>, 2016.
- 10 Eltner, A., Kaiser, A., Castillo, C., Rock, G., Neugirg, F., and Abellán, A.: Image-based surface reconstruction in geomorphometry – merits, limits and developments, *Earth Surface Dynamics*, 4, 359–389, doi:10.5194/esurf-4-359-2016, <http://www.earth-surf-dynam.net/4/359/2016/>, 2016.
- Etzel Müller, B.: Quantification of thermo-erosion in pro-glacial areas-examples from Svalbard, *Zeitschrift für Geomorphologie*, NF, pp. 343–361, 2000.
- 15 Etzel Müller, B. and Hagen, J. O.: Glacier-permafrost interaction in Arctic and alpine mountain environments with examples from southern Norway and Svalbard, *Geological Society, London, Special Publications*, 242, 11–27, 2005.
- Førland, E. J., Benestad, R., Hanssen-Bauer, I., Haugen, J. E., and Skaugen, T. E.: Temperature and precipitation development at Svalbard 1900–2100, *Advances in Meteorology*, 2011, 2012.
- Galland, O., Bertelsen, H. S., Guldstrand, F., Girod, L., Johannessen, R. F., Bjugger, F., Burchardt, S., and Mair, K.: Application of open-source photogrammetric software MicMac for monitoring surface deformation in laboratory models, *Journal of Geophysical Research: Solid Earth*, pp. n/a–n/a, doi:10.1002/2015JB012564, <http://dx.doi.org/10.1002/2015JB012564>, 2015JB012564, 2016.
- 20 Hagen, J. O. and Liestøl, O.: Long-term glacier mass-balance investigations in Svalbard, *Annals of Glaciology*, 14, 102–106, 1990.
- Humlum, O., Instanes, A., and Sollid, J. L.: Permafrost in Svalbard: a review of research history, climatic background and engineering challenges, *Polar research*, 22, 191–215, 2003.
- 25 James, M. R. and Robson, S.: Mitigating systematic error in topographic models derived from UAV and ground-based image networks, *Earth Surface Processes and Landforms*, pp. n/a–n/a, doi:10.1002/esp.3609, <http://dx.doi.org/10.1002/esp.3609>, 2014.
- Kääb, A. and Haeberli, W.: Evolution of a high-mountain thermokarst lake in the Swiss Alps, *Arctic, Antarctic, and Alpine Research*, pp. 385–390, 2001.
- Kääb, A., Girod, L., and Berthling, I.: Surface kinematics of periglacial sorted circles using structure-from-motion technology, *The Cryosphere*, 8, 1041–1056, doi:10.5194/tc-8-1041-2014, <http://www.the-cryosphere.net/8/1041/2014/>, 2014.
- 30 Kohler, J., James, T., Murray, T., Nuth, C., Brandt, O., Barrand, N., Aas, H., and Luckman, A.: Acceleration in thinning rate on western Svalbard glaciers, *Geophysical Research Letters*, 34, 2007.
- Liestøl, O.: Pingos, springs and permafrost in Spitsbergen, *Norsk Polarinstitutt Årbok 1975*, pp. 7–29, 1977.
- Microsoft: Microsoft Vexcel Ultracam Webpage, <https://www.microsoft.com/en-us/ultracam>, 2016.
- 35 Niethammer, U., Rothmund, S., James, M., Travelletti, J., and Joswig, M.: UAV-based remote sensing of landslides, *Int. Arch. Photogram. Remote Sensing Spatial Info. Sci*, 38, 496–501, 2010.

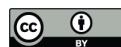

- Nolan, M., Larsen, C., and Sturm, M.: Mapping snow depth from manned aircraft on landscape scales at centimeter resolution using structure-from-motion photogrammetry, *The Cryosphere*, 9, 1445–1463, doi:10.5194/tc-9-1445-2015, <http://www.the-cryosphere.net/9/1445/2015/>, 2015.
- Nuth, C. and Kääb, A.: Co-registration and bias corrections of satellite elevation data sets for quantifying glacier thickness change, *The Cryosphere*, 5, 271–290, doi:10.5194/tc-5-271-2011, <http://www.the-cryosphere.net/5/271/2011/>, 2011.
- Ouédraogo, M. M., Degré, A., Debouche, C., and Lisein, J.: The evaluation of unmanned aerial system-based photogrammetry and terrestrial laser scanning to generate DEMs of agricultural watersheds, *Geomorphology*, 214, 339–355, 2014.
- Pierrot-Deseilligny, M.: MicMac Webpage, <http://logiciels.ign.fr/?-Micmac,3->, 2016.
- Pierrot-Deseilligny, M. and Clery, I.: Apero, an open source bundle adjustment software for automatic calibration and orientation of set of images, in: *Proceedings of the ISPRS Symposium, 3DARCH11*, pp. 269–277, 2011.
- Pierrot-Deseilligny, M., Jouin, D., Belvaux, J., Maillet, G., Girod, L., Rupnik, E., Muller, J., and Daakir, M.: *MicMac, Apero, Pastis and Other Beverages in a Nutshell!*, ENSG, IGN, Champs-Sur-Marne, France, 2016.
- Snavely, N., Seitz, S. M., and Szeliski, R.: Modeling the world from internet photo collections, *International Journal of Computer Vision*, 80, 189–210, 2008.
- Tonkin, T., Midgley, N., Cook, S., and Graham, D.: Ice-cored moraine degradation mapped and quantified using an unmanned aerial vehicle: a case study from a polythermal glacier in Svalbard, *Geomorphology*, pp. –, doi:<http://dx.doi.org/10.1016/j.geomorph.2015.12.019>, <http://www.sciencedirect.com/science/article/pii/S0169555X15302397>, 2015.
- Welty, E. Z., Bartholomaeus, T. C., O’Neel, S., and Pfeffer, W. T.: Cameras as clocks, *Journal of Glaciology*, 59, 275–286, doi:10.3189/2013JoG12J126, <http://www.ingentaconnect.com/content/igsoc/jog/2013/00000059/00000214/art00007>, 2013.
- Westoby, M., Brasington, J., Glasser, N., Hambrey, M., and Reynolds, J.: Structure-from-Motion photogrammetry: A low-cost, effective tool for geoscience applications, *Geomorphology*, 179, 300–314, 2012.
- Zemp, M., Jansson, P., Holmlund, P., Gärtner-Roer, I., Koblet, T., Thee, P., and Haerberli, W.: Reanalysis of multi-temporal aerial images of Storglaciären, Sweden (1959–1999) – Part 2: Comparison of glaciological and volumetric mass balances, *The Cryosphere*, 4, 345–357, doi:10.5194/tc-4-345-2010, <http://www.the-cryosphere.net/4/345/2010/>, 2010.
- Zemp, M., Thibert, E., Huss, M., Stumm, D., Rolstad Denby, C., Nuth, C., Nussbaumer, S. U., Moholdt, G., Mercer, A., Mayer, C., Joerg, P. C., Jansson, P., Hynek, B., Fischer, A., Escher-Vetter, H., Elvehøy, H., and Andreassen, L. M.: Reanalysing glacier mass balance measurement series, *The Cryosphere*, 7, 1227–1245, doi:10.5194/tc-7-1227-2013, <http://www.the-cryosphere.net/7/1227/2013/>, 2013.
